# Supplementary material
Source: PubMed Central journal article supplement (PMC524695)

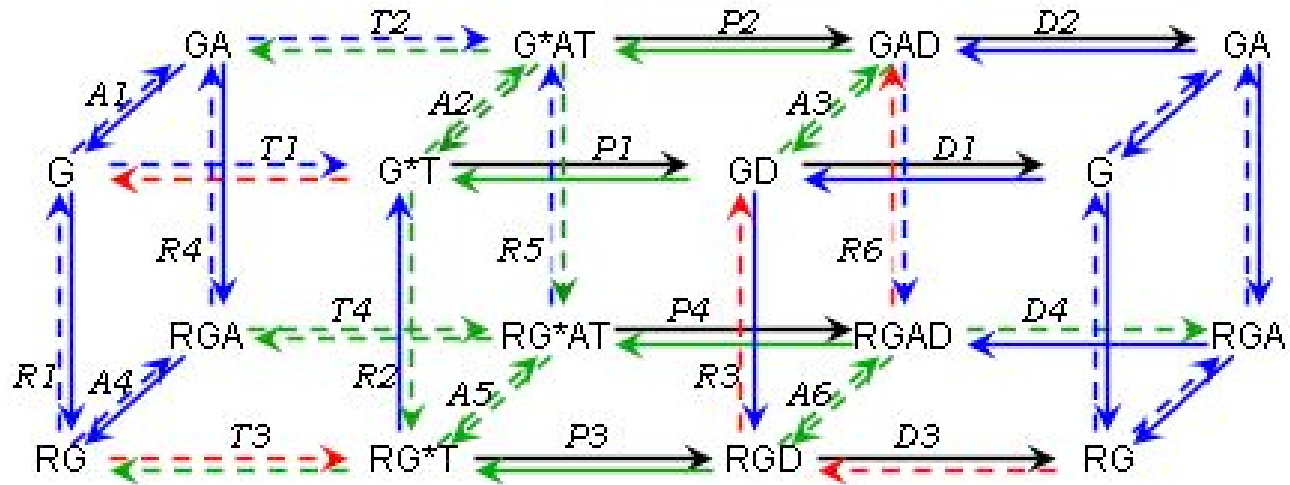

Supplement: pnas_101_45_15899__3.pdf [file pnas_101_45_15899__3.pdf]

Cobweb plot using 16 different good parameter-value sets

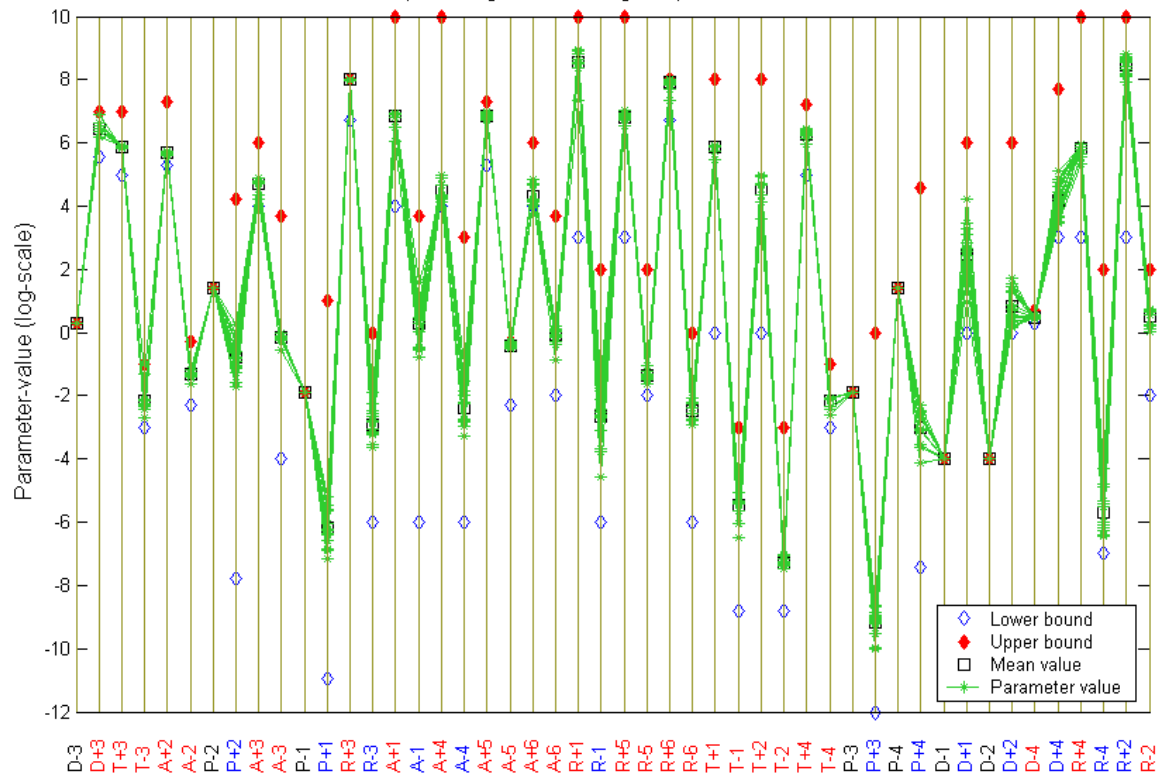

Supplement: pnas_101_45_15899__4.pdf [file pnas_101_45_15899__4.pdf]

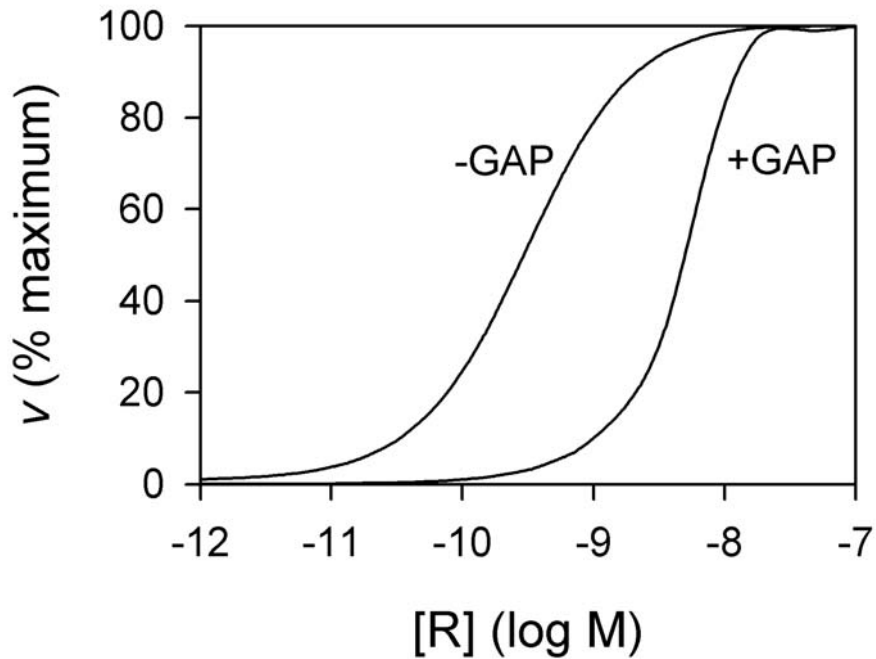

Supplement: pnas_101_45_15899__6.pdf [file pnas_101_45_15899__6.pdf]
